# Supplementary material for: ERK kinase phosphorylates and destabilizes the tumor suppressor FBW7 in pancreatic cancer
Source: PubMed Central journal article supplement — Cell Res. 2015 Mar 10;25(5):561–73. doi: 10.1038/cr.2015.30 (PMC4423074; doi:10.1038/cr.2015.30), 2015-03-10
Supplement: cr201530x1.pdf [file cr201530x1.pdf]

negative

weak

moderate

strong

FBW7

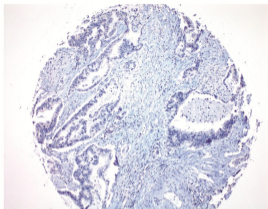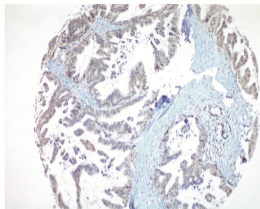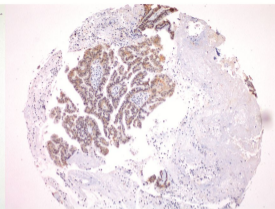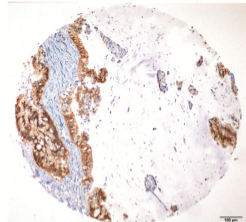

p-ERK

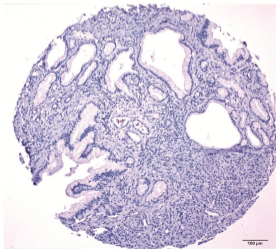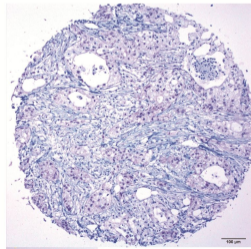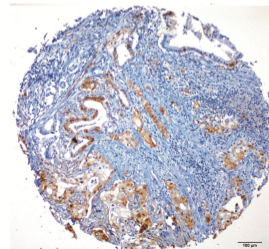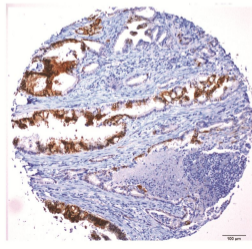

**Supplementary information, Figure S1 (related to Figure 1)** Representative micrographs showing negative, weak, moderate, or strong expression of FBW7 and p-ERK in pancreatic cancer tissues (scale bar: 100 $\mu$ m).
