# Supplementary material for: ERK kinase phosphorylates and destabilizes the tumor suppressor FBW7 in pancreatic cancer
Source: PubMed Central journal article supplement — Cell Res. 2015 Mar 10;25(5):561–73. doi: 10.1038/cr.2015.30 (PMC4423074; doi:10.1038/cr.2015.30), 2015-03-10
Supplement: cr201530x2.pdf [file cr201530x2.pdf]

Aspc-1  
Capan-1  
CFPAC-1  
PANC-1  
MIA PaCa-2  
SW1990

FBW7

p-ERK

c-Myc

CyclinE

Pin1

$\alpha$ -tubulin

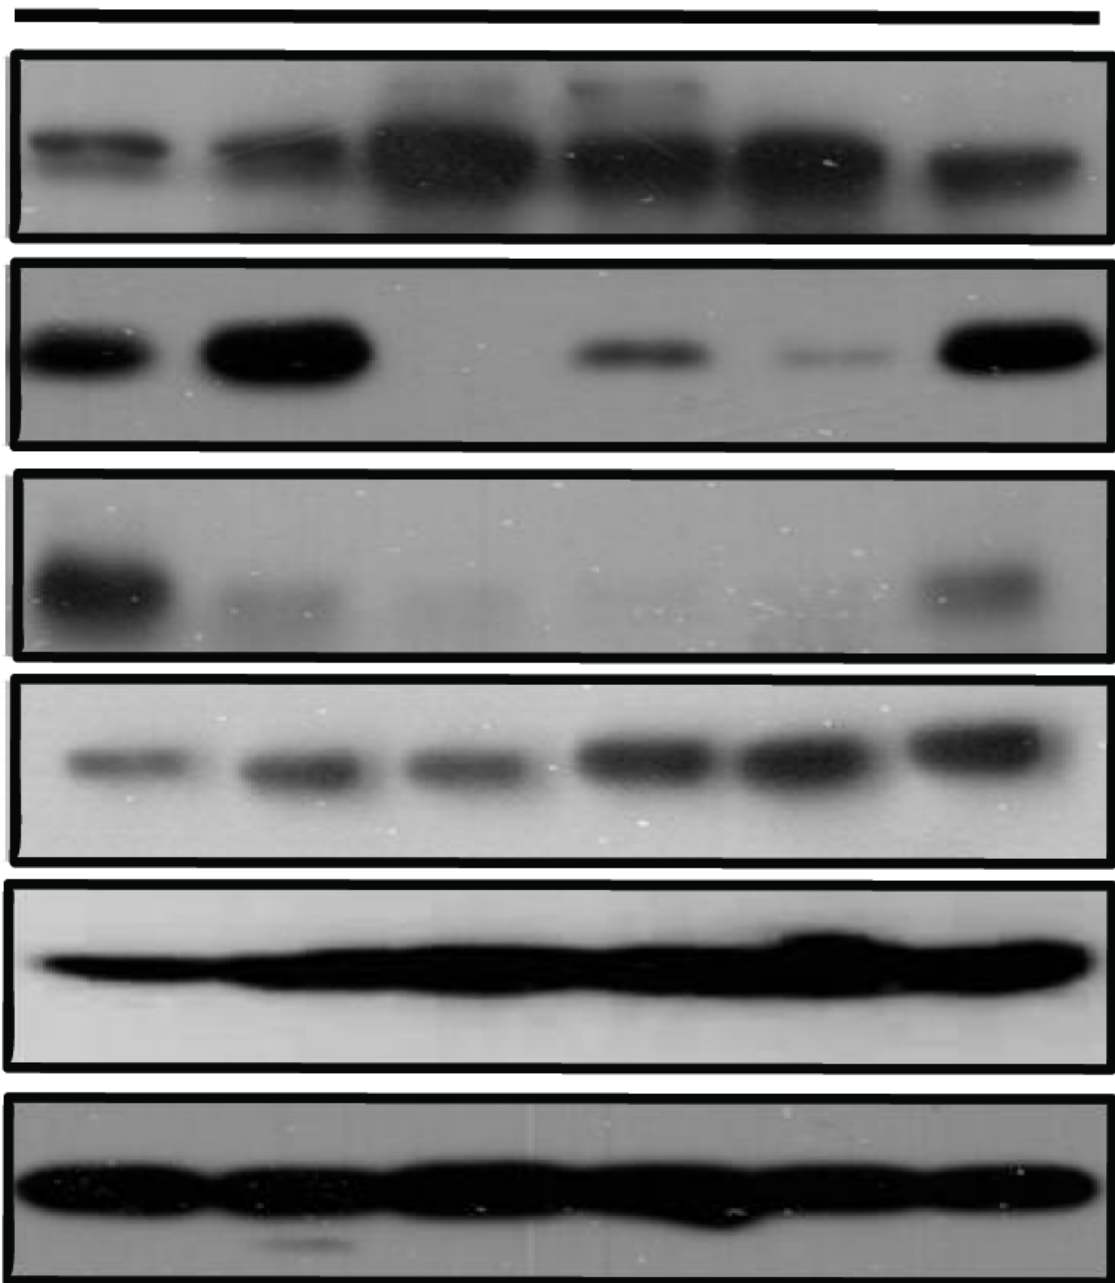

**Supplementary information, Figure S2 (related to Figure 2 and Figure 7)** Immunoblot analysis of FBW7, p-ERK, c-Myc, CyclinE and Pin1 expression level in 6 pancreatic cancer cells.  $\alpha$ -tubulin was used as a loading control.
