# Supplementary material for: ERK kinase phosphorylates and destabilizes the tumor suppressor FBW7 in pancreatic cancer
Source: PubMed Central journal article supplement — Cell Res. 2015 Mar 10;25(5):561–73. doi: 10.1038/cr.2015.30 (PMC4423074; doi:10.1038/cr.2015.30), 2015-03-10
Supplement: cr201530x3.pdf [file cr201530x3.pdf]

FBXW7/hCDC4- $\alpha$  promoter

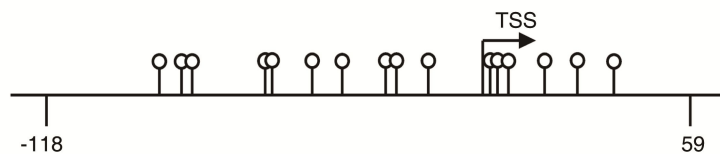

**B**

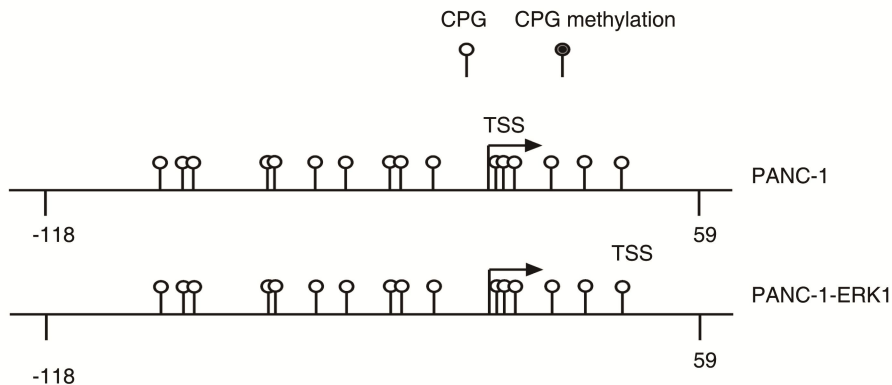

**C**

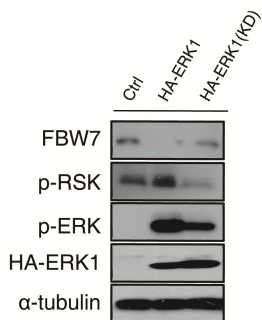

**D**

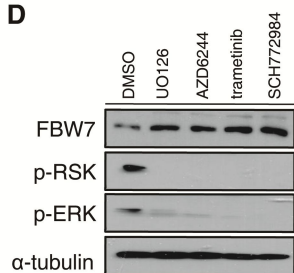

**E**

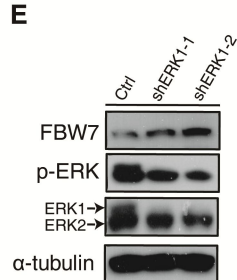

**F**

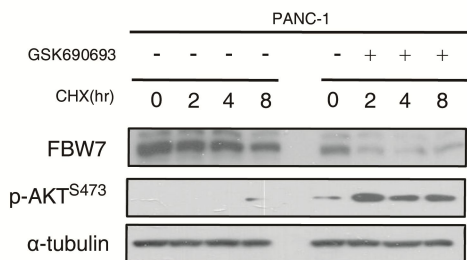

**G**

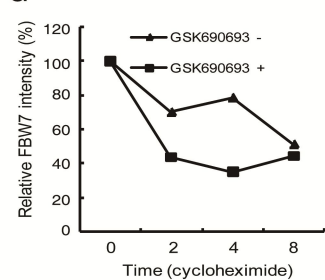

**Supplementary information, Figure S3 (related to Figure 3) ERK negatively regulates FBW7.**

(A) Schematic map of the longest transcript of FBXW7/hCDC4- $\alpha$  promoter region around the transcription start sites (TSS). CpG dinucleotides are depicted. (B) FBXW7/hCDC4- $\alpha$  core promoter region containing 16 CpG sites in PANC-1 cells were seldom methylated after introduction of ERK1. (C) PANC-1 cells were infected with wild type ERK1 and kinase-dead mutant expressing virus, and then incubated with 1 ug/ml puromycin to eliminate the non-infected cells. FBW7 expression was analyzed by immunoblot. (D) PANC-1 cells were treated with indicated inhibitors for 12h and cell lysates were collected and immunoblots were performed with the indicated antibodies. (E) SW1990 cells were infected with indicated lenti-viral shRNA vectors, and then incubated with 1 ug/ml puromycin to eliminate the non-infected cells. Cell lysates were collected and immunoblots were performed with the indicated antibodies. (F) PANC-1 cells were treated with 20  $\mu$ g/ml CHX in the presence or absence of 10  $\mu$ M GSK690693, and whole cell lysates (WCL) were collected at the indicated time points for immunoblot analysis. (G) Semi-quantification with  $\alpha$ -tubulin as a loading control and relative FBW7 levels at time 0 were set as 100%.
