# Supplementary material for: ERK kinase phosphorylates and destabilizes the tumor suppressor FBW7 in pancreatic cancer
Source: PubMed Central journal article supplement — Cell Res. 2015 Mar 10;25(5):561–73. doi: 10.1038/cr.2015.30 (PMC4423074; doi:10.1038/cr.2015.30), 2015-03-10
Supplement: cr201530x4.pdf [file cr201530x4.pdf]

20150128\_GDM\_FBW7\_E\_240min\_CID

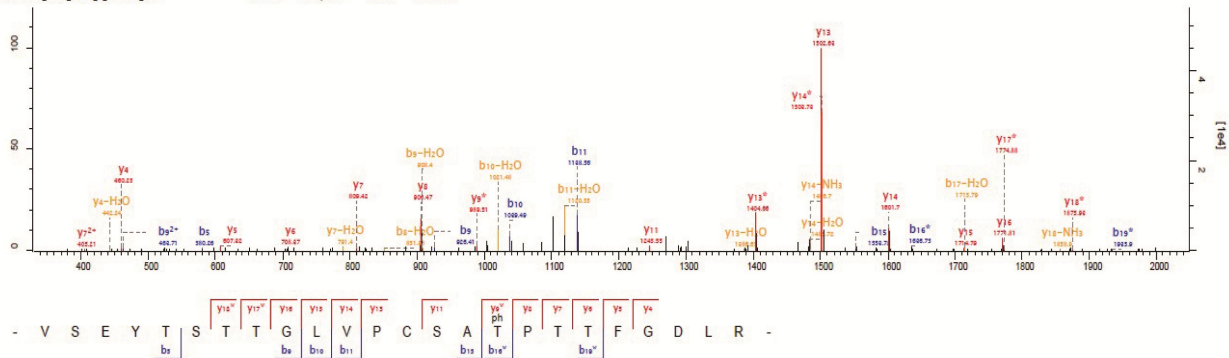**B**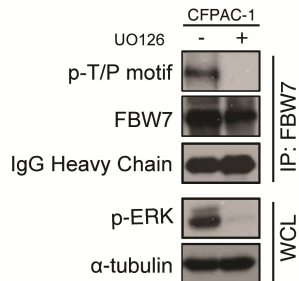**C**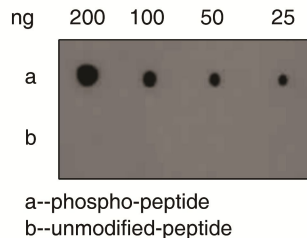**D**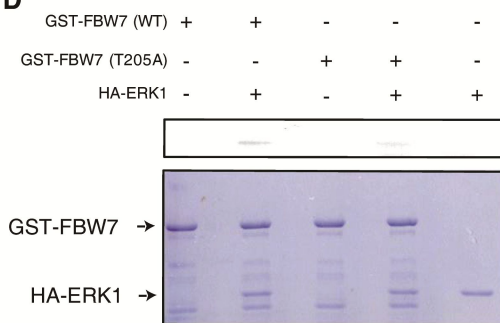

**Supplementary information, Figure S4 (related to Figure 5)** ERK phosphorylates FBW7 at T205.

**(A)** Detection of *in vivo* FBW7 T205 phosphorylation by mass spectrometry analysis. **(B)** CFPAC-1 cells were pretreated with the proteasome inhibitor MG132 and UO126, as indicated, overnight before harvest. Endogenous FBW7 phosphorylation status was examined by immunoblot analysis and immunoprecipitates (IP). The kinase reaction products were resolved by SDS-PAGE, and phosphorylation was detected by the phospho-Threonine-Proline monoclonal antibody (p-Thr-Pro-101). **(C)** Validation of phospho-T205-FBW7 antibody by dot blot assay. PVDF membrane was spotted with different amounts of phosphorylated or unmodified peptide and then blotted with p-FBW7 antibody. **(D)** ERK kinase phosphorylates FBW7 *in vitro* at T205. Purified ERK1 protein was incubated with 2  $\mu$ g of indicated GST-FBW7 in the presence of  $\gamma$ -<sup>32</sup>P-ATP. The kinase reaction products were resolved by SDS-PAGE, and phosphorylation was detected by autoradiography.
