# Supplementary material for: ERK kinase phosphorylates and destabilizes the tumor suppressor FBW7 in pancreatic cancer
Source: PubMed Central journal article supplement — Cell Res. 2015 Mar 10;25(5):561–73. doi: 10.1038/cr.2015.30 (PMC4423074; doi:10.1038/cr.2015.30), 2015-03-10
Supplement: cr201530x5.pdf [file cr201530x5.pdf]

|                  |   |   |   |   |
|------------------|---|---|---|---|
| Flag-FBW7(WT)    | + | + | - | - |
| Flag-FBW7(T205A) | - | - | + | + |
| MG132            | - | + | - | + |

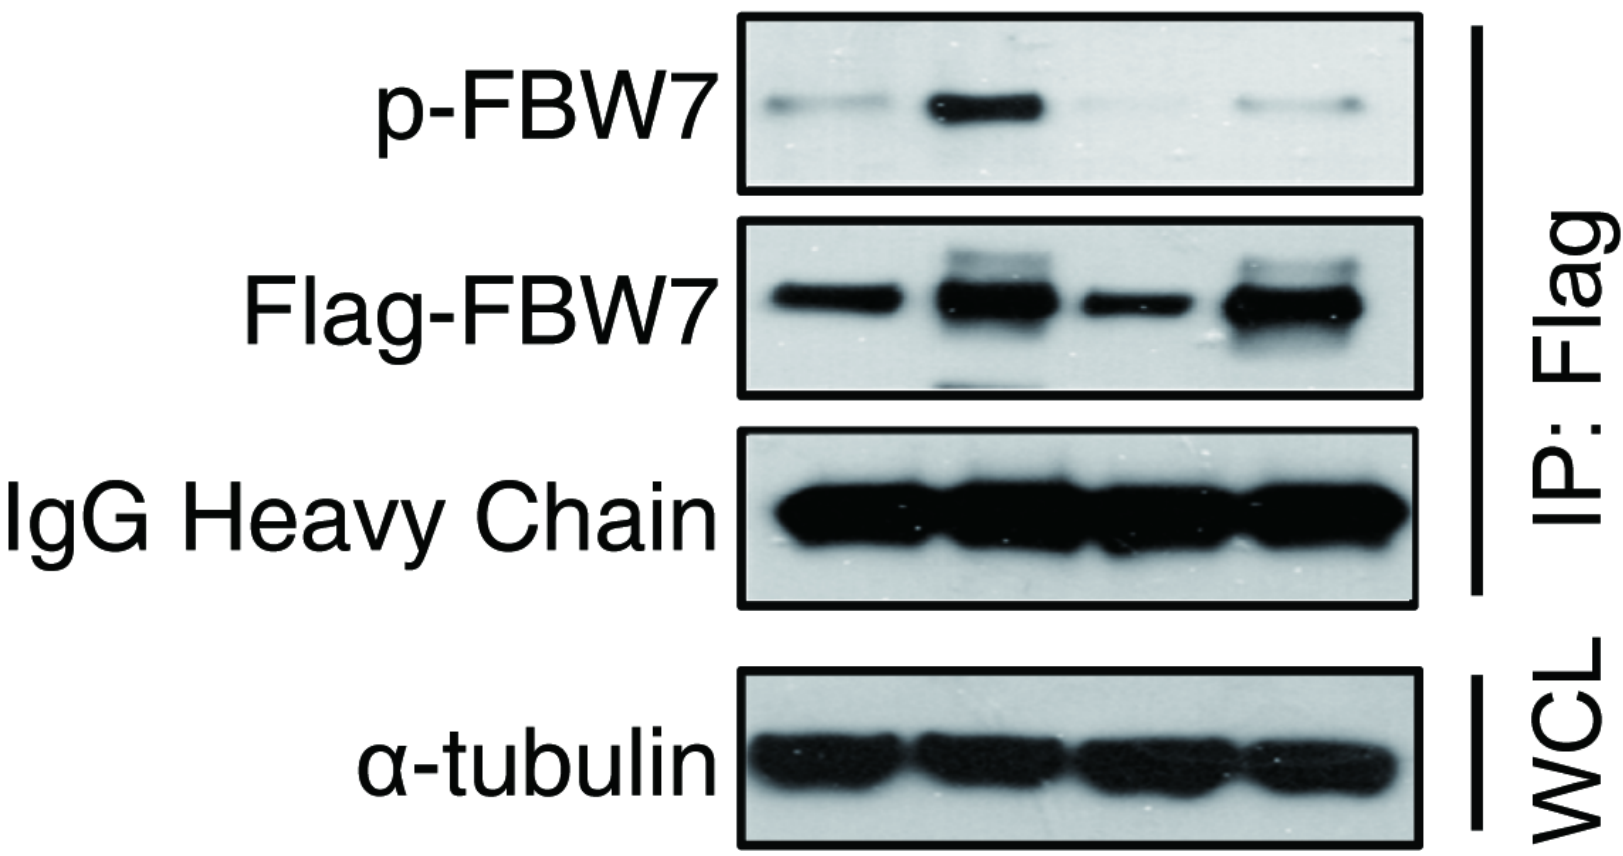

**Supplementary information, Figure S5 (related to Figure 6)** 293T cells were transfected with Flag-WT-FBW7 and Flag-T205A-FBW7 constructs.

Thirty hours post-transfection, cells were pretreated with the proteasome inhibitor MG132 overnight before harvesting. *In vivo* FBW7 phosphorylation status was examined by immunoblot analysis after immunoprecipitates (IP).
