# Supplementary material for: ERK kinase phosphorylates and destabilizes the tumor suppressor FBW7 in pancreatic cancer
Source: PubMed Central journal article supplement — Cell Res. 2015 Mar 10;25(5):561–73. doi: 10.1038/cr.2015.30 (PMC4423074; doi:10.1038/cr.2015.30), 2015-03-10
Supplement: cr201530x6.pdf [file cr201530x6.pdf]

**Supplementary information, Figure S6 (related to Figure 7)** Overexpression of FBW7 is significantly correlated with decreased expression levels of c-Myc in pancreatic cancer.

**(A)** SW1990 cells expressing FBW7 (wild type and T205A mutant) or empty vector were plated for transwell assay. **(B)** The results were quantified and presented as mean  $\pm$ SD from three independent experiments. **(C)** Western blot analysis for various known substrates of FBW7 in SW1990 cell lines stably expressing Flag-WT-FBW7 or Flag-T205A-FBW7 (with empty vector as a negative control). **(D)** Immunoblot (IB) analysis of whole cell lysates (WCL) and anti-c-Myc immunoprecipitates of SW1990 cell lines stably expressing FBW7 (wild type & T205A mutant) or empty vector. Cells were treated with MG132 overnight before harvest. **(E)** Western blot analysis for various known substrates of FBW7 in PANC-1 cell lines stably expressing Flag-WT-FBW7 or Flag-T205A-FBW7 (with empty vector as a negative control). **(F)** Representative images showing the correlation of p-ERK with FBW7 and c-Myc in PDAC clinical tumor samples. (Scale bars: 50  $\mu$ m).
