# Supplementary material for: ERK kinase phosphorylates and destabilizes the tumor suppressor FBW7 in pancreatic cancer
Source: PubMed Central journal article supplement — Cell Res. 2015 Mar 10;25(5):561–73. doi: 10.1038/cr.2015.30 (PMC4423074; doi:10.1038/cr.2015.30), 2015-03-10
Supplement: cr201530x7.pdf [file cr201530x7.pdf]

**A**

|                   |   |   |   |   |
|-------------------|---|---|---|---|
| Flag-FBW7 (WT)    | + | + | - | - |
| Flag-FBW7 (R465H) | - | - | + | + |
| Myc-Ub            | + | + | + | + |
| HA-ERK1           | - | + | - | + |

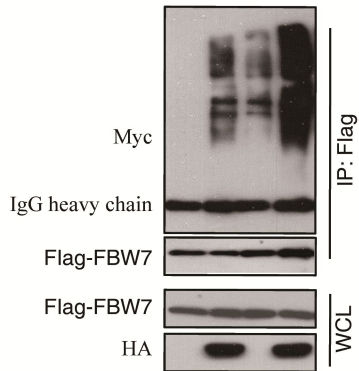**B**

|                   |   |   |   |   |
|-------------------|---|---|---|---|
| Flag-FBW7 (WT)    | - | + | - | - |
| HA-FBW7 (WT)      | + | + | - | - |
| Flag-FBW7 (T205A) | - | - | + | - |
| HA-FBW7 (T205A)   | - | - | + | - |
| Flag-FBW7 (T205E) | - | - | - | + |
| HA-FBW7 (T205E)   | - | - | - | + |

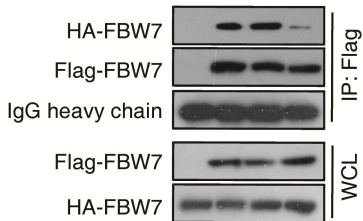**C**

|                   |   |   |   |   |
|-------------------|---|---|---|---|
| Flag-FBW7 (WT)    | + | + | - | - |
| Flag-FBW7 (T205E) | - | - | + | + |
| Myc-Ub            | - | + | - | + |

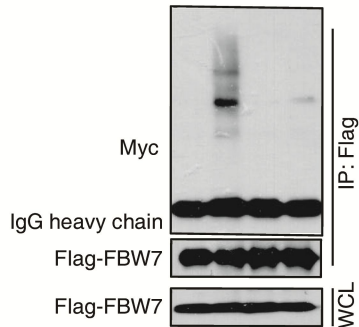

**Supplementary information, Figure S7 (A)** Immunoblot (IB) analysis of whole cell lysates (WCL) and anti-Flag immunoprecipitates of 293T cells transfected with Flag-WT-FBW7 and Flag-R465H-FBW7 constructs together with HA-ERK1 and Myc-Ub constructs. Thirty hours post-transfection, cells were pretreated with the proteasome inhibitor MG132 overnight before harvesting. **(B)** Immunoblot (IB) analysis of whole cell lysates (WCL) and anti-Flag immunoprecipitates of 293T cells transfected with various Flag-FBW7 and HA-FBW7 constructs. Thirty hours post-transfection, cells were pretreated with the proteasome inhibitor MG132 overnight before harvesting. **(C)** Immunoblot (IB) analysis of whole cell lysates (WCL) and anti-Flag immunoprecipitates of 293T cells transfected with Flag-WT-FBW7 and Flag-T205E-FBW7 together with Myc-Ub. Thirty hours post-transfection, cells were pretreated with the proteasome inhibitor MG132 overnight before harvesting.
