# Supplementary material for: ERK kinase phosphorylates and destabilizes the tumor suppressor FBW7 in pancreatic cancer
Source: PubMed Central journal article supplement — Cell Res. 2015 Mar 10;25(5):561–73. doi: 10.1038/cr.2015.30 (PMC4423074; doi:10.1038/cr.2015.30), 2015-03-10
Supplement: cr201530x8.pdf [file cr201530x8.pdf]

**Supplementary information, Table S1** Clinicopathological features and correlation of Fbw7

expression in PDAC.

|                          |            | <b>Fbw7<sup>Low-a</sup></b> | <b>Fbw7<sup>High-b</sup></b> |                |
|--------------------------|------------|-----------------------------|------------------------------|----------------|
| <b>Characteristics</b>   | <b>No.</b> |                             |                              | <b>P Value</b> |
| Age(y)                   |            |                             |                              | 0.802          |
| <60                      | 43         | 32                          | 11                           |                |
| ≥60                      | 43         | 33                          | 10                           |                |
| Gendar                   |            |                             |                              | 0.915          |
| Female                   | 36         | 27                          | 9                            |                |
| Male                     | 50         | 38                          | 12                           |                |
| Tumor size(cm)           |            |                             |                              | 0.156          |
| <4.0                     | 50         | 35                          | 15                           |                |
| ≥4.0                     | 36         | 30                          | 6                            |                |
| Tumor differentiation    |            |                             |                              | 0.017          |
| Well                     | 14         | 7                           | 7                            |                |
| Moderate                 | 43         | 32                          | 11                           |                |
| Poor                     | 29         | 26                          | 3                            |                |
| Lymph node status(stage) |            |                             |                              | 0.129          |
| Negative( II A)          | 58         | 41                          | 17                           |                |
| Positive( II B)          | 28         | 24                          | 4                            |                |
| Vessel Infiltration      |            |                             |                              | 0.606          |
| Negative                 | 75         | 56                          | 19                           |                |
| Positive                 | 11         | 9                           | 2                            |                |
| Nerve Infiltration       |            |                             |                              | 0.699          |
| Negative                 | 19         | 15                          | 4                            |                |
| Positive                 | 67         | 50                          | 17                           |                |

a:Fbw7<sup>Low</sup>--negative/weak Fbw7 expression; b: Fbw7<sup>High</sup>--moderate/strong Fbw7 expression
