# Supplementary material for: ERK kinase phosphorylates and destabilizes the tumor suppressor FBW7 in pancreatic cancer
Source: PubMed Central journal article supplement — Cell Res. 2015 Mar 10;25(5):561–73. doi: 10.1038/cr.2015.30 (PMC4423074; doi:10.1038/cr.2015.30), 2015-03-10
Supplement: cr201530x9.pdf [file cr201530x9.pdf]

**Supplementary information, Table S2** Alterational Rates of *KRAS* and *Fbw7* in 60 selected

patients.

|          | <i>KRAS</i> | <i>Fbw7</i>    |
|----------|-------------|----------------|
| <i>n</i> | 56          | 1 <sup>c</sup> |
| %        | 93.3        | 1.67           |

c:V327V mutation
