# Supplementary material for: ERK kinase phosphorylates and destabilizes the tumor suppressor FBW7 in pancreatic cancer
Source: PubMed Central journal article supplement — Cell Res. 2015 Mar 10;25(5):561–73. doi: 10.1038/cr.2015.30 (PMC4423074; doi:10.1038/cr.2015.30), 2015-03-10
Supplement: cr201530x10.pdf [file cr201530x10.pdf]

**Supplementary information, Table S3** List of shRNA oligos and siRNA duplex sense sequence

| Gene   | target sequence(5'-3') |
|--------|------------------------|
| siErk1 | CGACCUUAAGAUUUGUGAU    |
|        | UGAUGGAGACUGACCUGUA    |
|        | CCUGCUGGACCGGAUGUUA    |
| siErk2 | GACUCCAAAGCUCUGGACU    |
|        | CACCAUUCAAGUUCGACAU    |
|        | CACCAACCAUCGAGCAAAU    |
| siPin1 | CAGGCCGAGUGUACUACUU    |
|        | CCAUUUGAAGACGCCUCGU    |
|        | AGAAGAUCACCCGGACCAA    |
| shErk1 | GACCGGATGTTAACCTTTAAC  |
|        | AGACTGACCTGTACAAGTTGC  |
